# Supplementary material
Source: PubMed Central journal article supplement (PMC8209550)
Supplement: bloodBLD2019004685-suppl1.pdf [file bloodBLD2019004685-suppl1.pdf]

## Impact of TKI maintenance on patients who were in CR and alive at three months post-transplant

In our cohort, 135 patients were in CR and remained alive without progression at approximately 3 months. 67 patients were started on prophylactic TKI within three months of transplant (group A). 23 patients were started on TKI after MRD became positive (MRD-triggered, group B). Total of 48 patients did not receive any TKI (group C). The median survival in group A, B and C were not reached, 33.1 months and 7.81 months, respectively (p-value = <0.0001).

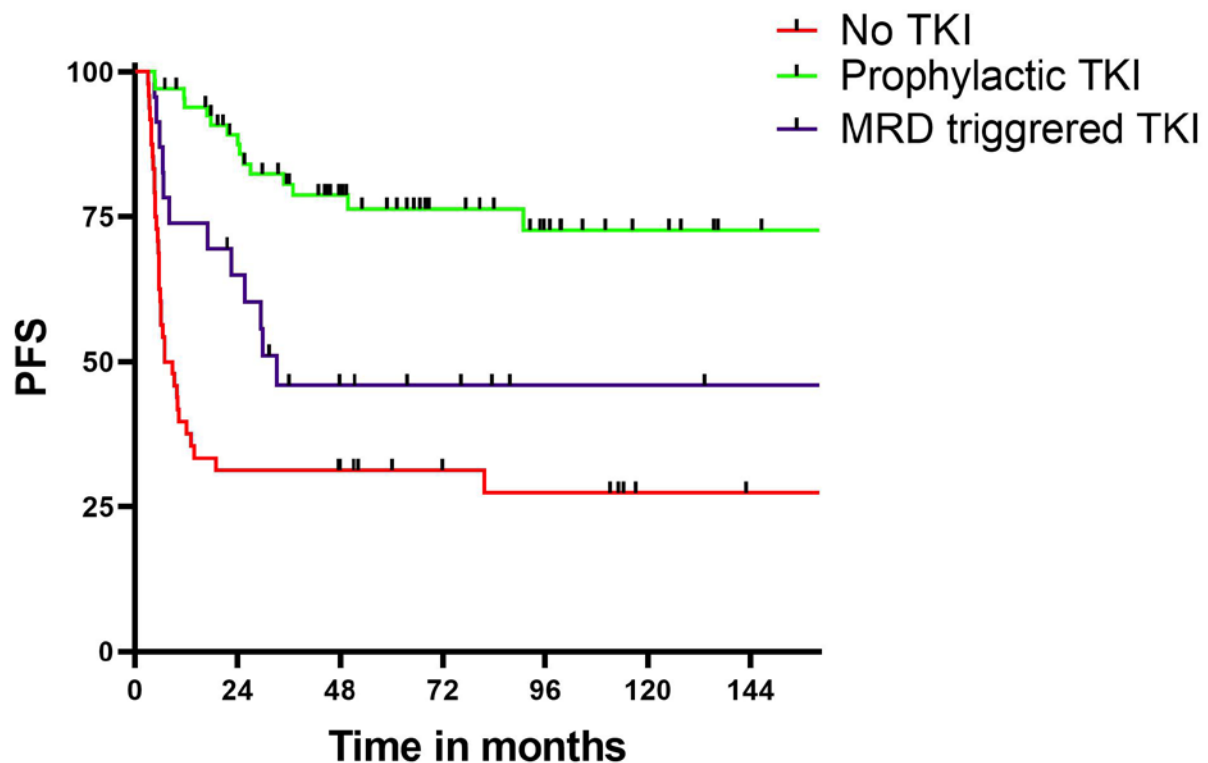

*In an allogeneic-transplant population, the retrospective comparison between a maintenance therapy group with a no-maintenance group is fraught with glaring biases. Patients who have poor performance status post-allo-HSCT or who have developed complications related to transplant such as GVHD, recurrent infections or poor count recovery are less able to receive TKI maintenance. We reasoned that the effects of early treatment-related mortality have mostly resolved by the 3-months mark, and the majority of relapses would not have yet occurred. An earlier time-point would cause adulteration of effect of treatment-related mortality/GVHD in both arms, and a later time-point would hide TKI-prevented relapses. To*

*keep our population homogeneous between two comparative arms, we decided to elect 3 months as the most appropriate time-point when effects of non-relapse mortality and other issues as explained above will have lesser impact on patient's selection in one arm versus another. Therefore, above analysis can be misleading and to truly analyze the impact of TKI, we compared only those patients who were in CMR at the time of transplant and remained in CMR at three months post-transplant (please see the analysis in the main manuscript).*

**Table S1. Univariate and multivariate analysis of Cumulative Incidence of Relapse (CIR)**

| Covariates                                                         | Univariate Analysis   |         | Multivariate analysis               |              |
|--------------------------------------------------------------------|-----------------------|---------|-------------------------------------|--------------|
|                                                                    | HR ( 95% CI)          | p-value | HR ( 95% CI)                        | p-value      |
| Type of transplant<br>-Cord/Haplo<br>-Matched related / unrelated  | 1.23<br>(0.49 – 3.04) | 0.65    |                                     |              |
| Disease status at transplant<br>- CR ≥2<br>- CR 1                  | 3.06<br>(1.5 – 6.26)  | 0.002   | <b>3.36</b><br><b>(1.54 – 7.32)</b> | <b>0.002</b> |
| Age (years)<br>- 40<br>- >40                                       | .646<br>(0.3 – 1.3)   | 0.23    |                                     |              |
| Molecular status at transplant<br>- others<br>- CMR                | 2.4<br>(1.06 – 5.42)  | 0.035   | <b>2.5</b><br><b>(1.09 – 5.71)</b>  | <b>0.03</b>  |
| Cytogenetics status<br>- Ph+ alone<br>- Ph+ plus other cyto. abnl. | .269<br>(0.11 – 0.63) | 0.003   | <b>0.3</b><br><b>(0.133 – 0.70)</b> | <b>0.006</b> |
| Sex<br>- Female<br>- Male                                          | 0.85<br>(.41 – 1.77)  | 0.6     |                                     |              |
| HCT- CI<br>- 0<br>- > 0                                            | 0.98<br>(0.37 – 2.6)  | 0.974   |                                     |              |
| Karnofsky<br>- ≥90<br>- <90                                        | 1.29<br>(0.54 – 3.0)  | 0.55    |                                     |              |
| Conditioning regimen<br>- Reduced Intensity<br>- Myeloablative     | 1.26<br>(0.33 – 5.34) | 0.746   |                                     |              |

**Table S2****Patient characteristics**

This table includes patients who were in CMR at the time of transplant and remained alive in CMR at three months after transplant. Among this cohort, 18 received prophylactic TKI (group A). Patients in group B either did not receive TKI or received TKI after three months of transplant.

| Patient characteristics                   | Prophylactic TKI<br>n=18 | No or delayed TKI<br>n=24 | p value            |
|-------------------------------------------|--------------------------|---------------------------|--------------------|
| Median Age (Range) in years               |                          |                           | 0.175              |
| Age upto 40                               | 11                       | 10                        |                    |
| Age >40                                   | 7                        | 14                        |                    |
| Sex                                       |                          |                           | 0.627              |
| Male                                      | 12                       | 16                        |                    |
| Female                                    | 6                        | 8                         |                    |
| Cytogenetics at diagnosis                 |                          |                           | 0.428              |
| Ph alone                                  | 13                       | 14                        |                    |
| Ph plus other cytogenetics                | 5                        | 8                         |                    |
| Unknown*<br>n=2                           |                          | 2                         |                    |
| Karnofsky Score                           |                          |                           | 0.082              |
| ≥90                                       | 16                       | 18                        |                    |
| <90                                       | 2                        | 4                         |                    |
| Disease status at allo-HCT,               |                          |                           | 0.059              |
| CR1                                       | 17                       | 17                        |                    |
| CR2                                       | 1                        | 6                         |                    |
| CR3+                                      | 0                        | 1                         |                    |
| Presence of MRD at HSCT, BCR-ABL (RT-PCR) |                          |                           | selection variable |
| CMR                                       | 18                       | 24                        |                    |
| Transplant conditioning                   |                          |                           | 0.571              |
| Myeloablative                             | 18                       | 23                        |                    |
| Reduced-intensity                         | 0                        | 1                         |                    |
| Donor type                                |                          |                           | 0.44               |
| MRD                                       | 10                       | 9                         |                    |
| MUD                                       | 5                        | 10                        |                    |
| MMUD                                      | 0                        | 2                         |                    |
| Haploidentical                            | 1                        | 2                         |                    |
| Cord                                      | 2                        | 1                         |                    |

**Table S3.****Median duration of maintenance for each TKI**

| TKIs      | Number | Median in days | Range in days |
|-----------|--------|----------------|---------------|
| Imatinib  | 38     | 373            | 10 -2222      |
| Dasatinib | 31     | 497            | 7 - 1945      |
| Ponatinib | 11     | 460            | 97-1504       |
| Bosutinib | 1      | 1062           | n/a           |
| Nilotinib | 1      | 124            | n/a           |

**Table S4****Table below presents individual data on 21 patients whose TKI was stopped because of disease relapse.**

| Patient Number | TKI Drug                                    | Disease response prior to transplant | Time to TKI initiation after transplant (in days) | Duration of TKI before relapse (in days) |
|----------------|---------------------------------------------|--------------------------------------|---------------------------------------------------|------------------------------------------|
| 1              | Imatinib                                    | CR1                                  | 26.00                                             | 461.00                                   |
| 2              | Imatinib                                    | CR1                                  | 155.00                                            | 11.00                                    |
| 3              | Imatinib                                    | CR1                                  | 72.00                                             | 106.00                                   |
| 4              | Imatinib                                    | CR1                                  | 61.00                                             | 78.00                                    |
| 5              | Imatinib                                    | CR2                                  | 370.00                                            | 338.00                                   |
| 6              | Imatinib                                    | PD                                   | 90.00                                             | 34.00                                    |
| 7              | Imatinib                                    | CR1                                  | 40.00                                             | 37.00                                    |
| 8              | Imatinib                                    | CR1                                  | 35.00                                             | 620.00                                   |
| 9**            | Imatinib switched to Dasatinib              | CR1                                  | 48.00                                             | 132.00                                   |
| 10             | Imatinib                                    | CR2                                  | 57.00                                             | 14.00                                    |
| 11             | Imatinib                                    | CR 2                                 | 79.00                                             | 10.00                                    |
| 12**           | Imatinib switched to Dasatinib              | CR1                                  | 42.00                                             | 562.00                                   |
| 13**           | Imatinib switched to Dastinib               | CR1                                  | 84.00                                             | 216.00                                   |
| 14             | Dasatinib                                   | CR2                                  | 184.00                                            | 215.00                                   |
| 15             | Dasatinib                                   | CR1                                  | 47.00                                             | 302.00                                   |
| 16**           | Dasatinib switched to ponatinib             | CR2                                  | 81.00                                             | 16.00                                    |
| 17             | Dasatinib                                   | CR2                                  | 44.00                                             | 11.00                                    |
| 18**           | Imatinib switched to Ponatinib to Bosutinib | CR1                                  | 161.00                                            | 652.00                                   |
| 19             | Dasatinib                                   | CR1                                  | 62.00                                             | 168.00                                   |
| 20             | Dasatinib                                   | CR2                                  | 126.00                                            | 7.00                                     |
| 21**           | Dasatinib switched to bosutinib             | CR1                                  | 38.00                                             | 339.00                                   |

\*\*\* CR1: complete response 1, CR2: complete response 2, PD -progressive disease

TKI stopped in 21 patients due to disease relapse. Number of relapses in individual TKI is below:  
Imatinib = 10; Dasatinib = 5; Combination of TKI = 6

\*\*Patients were switched from one to another TKI due to intolerance.

*The median time to relapse in those patients who stopped TKI for reasons other than relapse (excluding patients who suffered non-relapse mortality) was 146 days (range 36 – 746).*
